# Supplementary material for: Immune responses upon Campylobacter jejuni infection of secondary abiotic mice lacking nucleotide-oligomerization-domain-2
Source: PubMed Central journal article supplement (PMC5461728; doi:10.1186/s13099-017-0182-0), 2017-06-06

**Fig S4**

**Naive**

**d7**

**WT**

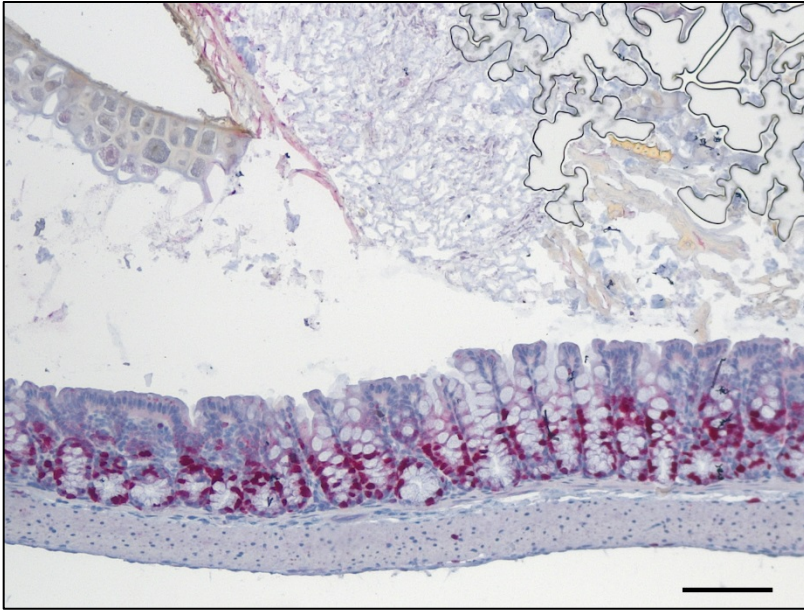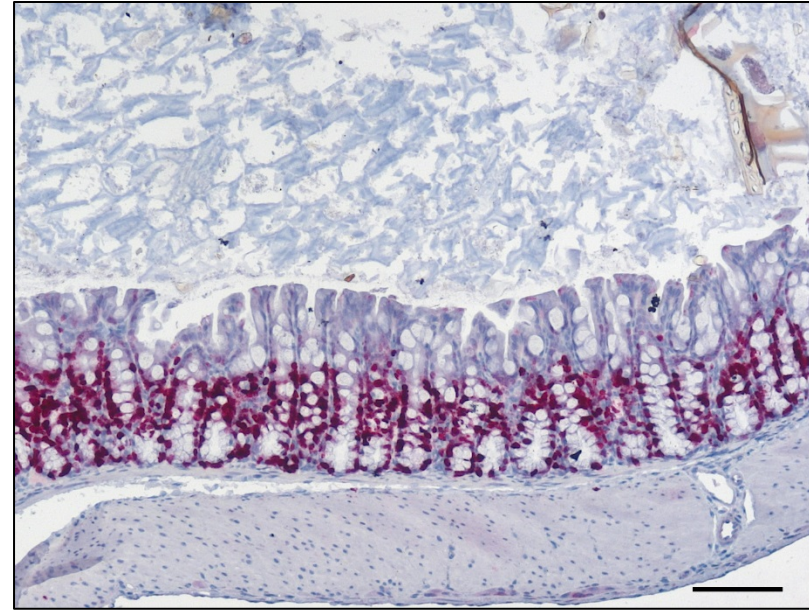

**Nod2<sup>-/-</sup>**

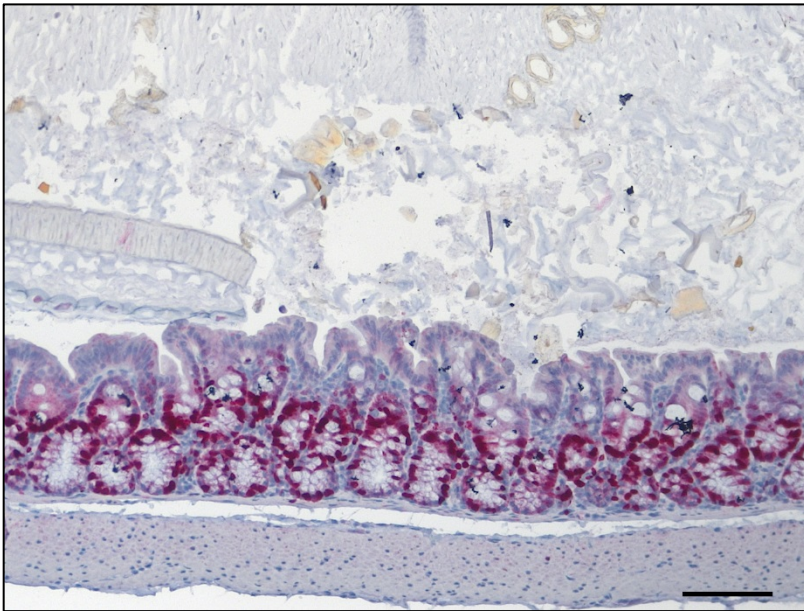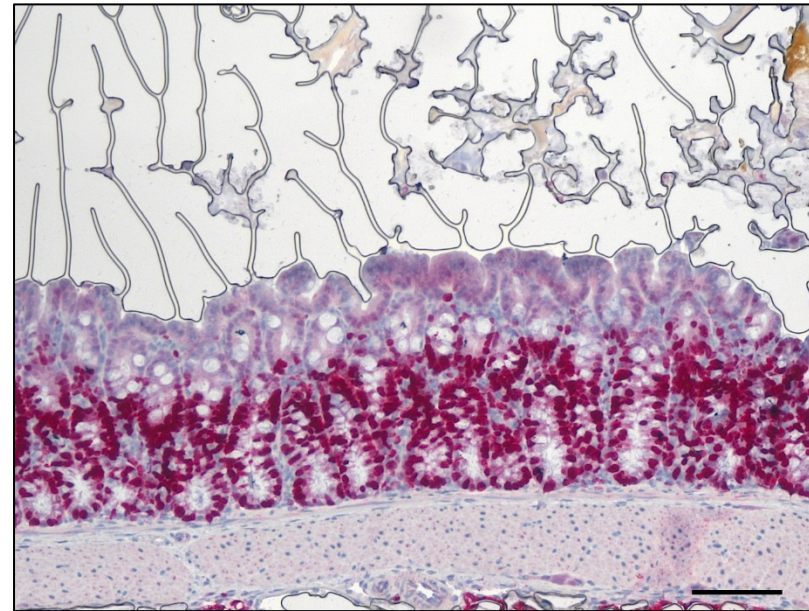

Supplement: 13099_2017_182_MOESM4_ESM.pdf [file 13099_2017_182_MOESM4_ESM.pdf]
